## Original Contribution

# Social Inequalities in Suicide: The Role of Selective Serotonin Reuptake Inhibitors

Sean A. P. Clouston\*, Marcie S. Rubin, Cynthia G. Colen, and Bruce G. Link

\* Correspondence to Sean A. P. Clouston, Department of Preventive Medicine and Program in Public Health, #3-071, Stony Brook University, Health Sciences Center, 101 Nicholls Road, Stony Brook, NY 11794 (e-mail: sean.clouston@stonybrookmedicine.edu).

Initially submitted November 27, 2013; accepted for publication June 25, 2014.

We aimed to examine the relationship between socioeconomic status (SES) and suicide associated with the introduction and diffusion of selective serotonin reuptake inhibitors (SSRIs). Negative binomial regression was used to estimate county-level suicide rates among persons aged 25 years or older using death certificate data collated by the National Center for Health Statistics from 1968 to 2009; SES was measured using the decennial US Census. The National Health and Nutrition Examination Survey and the Medical Expenditure Panel Survey were used to measure SSRI use. Once SSRIs became available in 1988, a 1% increase in SSRI usage was associated with a 0.5% lower suicide rate. Prior to the introduction of SSRIs, SES was not related to suicide. However, with each 1% increase in SSRI use, a 1-standard deviation (SD) higher SES was associated with a 0.6% lower suicide rate. In 2009, persons living in counties with SES 1 SD above the national average were 13.6% less likely to commit suicide than those living in counties with SES 1 SD below the national average—a difference of 1.9/100,000 adults aged  $\geq 25$  years. Higher SSRI use was associated with lower suicide rates among US residents aged  $\geq 25$  years; however, SES inequalities modified the association between SSRI use and suicide.

history of medicine; selective serotonin reuptake inhibitors; social epidemiology; social inequality; socioeconomic status; suicide; United States

Abbreviations: MEPS, Medical Expenditure Panel Study; NHANES, National Health and Nutrition Examination Survey; SES, socioeconomic status; SSRI, selective serotonin reuptake inhibitor.

Approximately 37,000 deaths each year in the United States are due to suicide (1). It is the tenth most prominent cause of death, killing 3 times as many people as homicide, and in 2009 it accounted for approximately 1.5% of all-cause mortality among persons over age 10 years (1). The likelihood of committing suicide is distributed differently by sex, age, and race/ethnicity, with higher rates of suicide being reported among men, older persons, adolescents and young adults, and whites. However, the American Association for Suicidology does not list socioeconomic status (SES) as an associated risk factor (2). Of the few studies that have examined social determinants of suicide, many have focused on age, unemployment, and marital dissolution as triggers for suicide (3–6). In the latest review, Wray et al. (4) noted that no published studies have emerged linking SES and suicide in the United States. However, recent analysis of trends in South Korea suggests that broad class-based inequalities in

suicide have existed since the 1990s and may be growing (7, 8), with similar trends emerging in US suicide data (9).

Why might social inequalities in suicide be emerging or changing? According to one theory, socioeconomic inequalities in health emerge in part because people marshal all of the resources at their disposal, including knowledge, money, power, prestige, and beneficial social connections, to secure access to effective preventive and therapeutic advances (10). When preventions are available, people with greater socioeconomic resources are better able to access and more effectively use health-promoting resources than those with fewer socioeconomic resources (11–14). Similarly, those who live in higher-SES areas are more likely to hear about, have access to, and visit institutions that provide new life-saving innovations (15–17).

At the individual level, it has been estimated that 90% of all suicides occur among persons with existing psychiatric

illnesses, particularly depression (18). Selective serotonin reuptake inhibitors (SSRIs) have been associated with reductions in the number and severity of depressive symptoms in adults, thereby potentially decreasing the likelihood of suicidal thoughts as well as subsequent suicidal behavior (19). Indeed, a recent systematic review suggested that SSRIs may reduce the risk of suicide by as much as 40% for persons aged 25 years or older (20). There has been a substantial push towards using SSRIs to treat depression: One report estimates that 1 in 10 Americans currently use antidepressants, including SSRIs (21). Concurrent with the increase in SSRI use has been a decline in age-adjusted suicide rates, which decreased from a high of 13.0/100,000 persons in 1986 to a low of 10.4/100,000 persons in 2000, though they have been increasing again of late (22). Similar ecological findings from around the world have led researchers to conclude that an increase in SSRI use is associated with reductions in suicide (23–26).

The role of socioeconomic inequalities may then relate to the provision of SSRI treatments if there are inequalities in how people seek help and the type of help they receive. Although suicidal behaviors can be effectively prevented through accurate diagnosis of suicidal symptomatology and treatment of underlying psychiatric disorders, only 64% of suicidal persons seek professional help (27). Of those who do seek help, SES is predictive of the type of help that people seek when contemplating suicide, with persons in higher-SES positions being more likely to seek help from psychiatric professionals (28). Furthermore, many of those who seek help do so from health-care providers who cannot adequately address their underlying mental health problems or prescribe SSRIs (29, 30). However, once people do obtain professional help, SES does not influence who receives SSRIs (31). Because of the unequal distribution of mental health services across disparate segments of the population, treatment of underlying psychiatric conditions with SSRIs is more common among persons of high SES than among their low-SES counterparts (32).

We tested the following hypotheses using data from the National Death Index for suicide and data from the US Census to create county-level indicators of SES. First, because of an increase in the preventability of suicide through the use of SSRIs, we expected to observe a significant reduction in the overall suicide rate following the introduction of SSRIs in 1988. Second, we hypothesized that there would be a significant increase in the impact of SES on suicide following the widespread dissemination of SSRIs, with rates of deaths attributable to suicide decreasing most dramatically in higher-SES areas.

## METHODS

### Data

We analyzed county-specific mortality rates calculated using mortality rates derived from 42 years of death certificates and midyear population counts derived from the US Census (33–35). We identified persons who died from suicide using *International Classification of Diseases* categories indicating death due to intentional self-harm (*International Classification of Diseases*, Eighth and Ninth revisions,

codes E950–E959; *International Classification of Diseases*, Tenth Revision, codes X60–X84 and Y87.0). Deaths were compiled according to county of residence; nonresident US citizens were excluded from analysis. Individual age (in 10-year age groups), sex, and race were recorded on death certificates. We included information on 99% of counties in the continental United States and Hawaii ( $n = 3,110$ ). We excluded counties whose borders were substantially altered during the study period. We limited our sample to adults aged 25 years or more, because the use of SSRIs has not been related to a decrease in suicide risk for younger persons (36) and because SSRIs are not clearly effective in treating depression among persons under age 25 years (37–39). We included information for blacks and whites, but we excluded data on persons of “other” races because of a lack of comparability in racial categories over time. We weighted the analyses using the 2000 standard US population. The analytical sample incorporated 6.23 billion person-years (Table 1).

### Covariates

For the independent variable of interest, we created an aggregate measure of SES for each county in the United States using Census data from 1970, 1980, 1990, and 2000. Our measure of SES was based on 5 distinct variables: the proportion of individuals in each county with fewer than 9 years of education; the proportion of individuals in each county with more than 12 years of education; the proportion of individuals in each county with white-collar occupations; the proportion of families at or above the federally defined poverty level; and the proportion of households with access to a telephone (40). Use of principal-components analysis provided a single-factor solution, with 1 dominant eigenvalue and factor weights of 0.90, 0.97, 0.72, 0.74, and 0.86, respectively. We employed principal-components analysis to ensure that all 5 variables were capturing a single underlying construct. We linearly interpolated data to estimate this aggregate SES measure for intercensal years.

To assess SSRI use, we relied on 2 data sets to estimate population-weighted rates of race-, age-, region-, and sex-specific SSRI usage for persons aged 25 years or above. For 1996–2009, we used data from the Medical Expenditure Panel Survey (MEPS), which was designed to be representative within census regions and which interviewed 13,000–22,000 subjects per year, with response rates ranging from 62.8% to 78.0%. In the survey, respondents list prescription medications they have taken over the course of the past year; further information about type, dosage, and expenditure on prescription medications is collected from respondents’ pharmacies (41). Because MEPS data were not available prior to 1996, we used complementary data from 2 waves (1988–1991 and 1991–1994) of the National Health and Nutrition Examination Survey (NHANES) (response rate = 86%) (42). To record SSRI use, NHANES interviewers asked respondents (numbering approximately 8,000 per wave) to show their current prescription medication bottles. We averaged data from the 2 NHANES waves to estimate a result for 1991 and further interpolated results at the national level to estimate SSRI usage in 1995; we set SSRI use prior to 1988 to zero. SSRI use increased rapidly between the NHANES and MEPS assessments; therefore, we

**Table 1.** Numbers of Suicides per Person-Year and Estimated Percentage of Persons Using Selective Serotonin Reuptake Inhibitors in Each Year, United States, 1968–2009<sup>a</sup>

| Year | Estimated SSRI Use, % | No. of Suicides | No. of Person-Years | Crude Suicide Rate per 100,000 Adults Aged ≥25 Years |
|------|-----------------------|-----------------|---------------------|------------------------------------------------------|
| 1968 | 0                     | 18,546          | 106,230,670         | 17.46                                                |
| 1969 | 0                     | 19,098          | 107,425,900         | 17.78                                                |
| 1970 | 0                     | 19,790          | 108,492,600         | 18.24                                                |
| 1971 | 0                     | 20,036          | 110,196,550         | 18.18                                                |
| 1972 | 0                     | 20,558          | 112,584,090         | 18.26                                                |
| 1973 | 0                     | 20,357          | 114,597,890         | 17.76                                                |
| 1974 | 0                     | 20,638          | 116,567,770         | 17.70                                                |
| 1975 | 0                     | 21,610          | 118,495,090         | 18.24                                                |
| 1976 | 0                     | 21,388          | 120,640,690         | 17.73                                                |
| 1977 | 0                     | 22,285          | 122,916,050         | 18.13                                                |
| 1978 | 0                     | 21,469          | 125,326,460         | 17.13                                                |
| 1979 | 0                     | 21,233          | 127,862,980         | 16.61                                                |
| 1980 | 0                     | 20,893          | 129,813,330         | 16.09                                                |
| 1981 | 0                     | 21,646          | 132,730,840         | 16.31                                                |
| 1982 | 0                     | 22,364          | 135,143,200         | 16.55                                                |
| 1983 | 0                     | 22,604          | 137,497,690         | 16.44                                                |
| 1984 | 0                     | 23,353          | 139,816,720         | 16.70                                                |
| 1985 | 0                     | 23,381          | 142,065,910         | 16.46                                                |
| 1986 | 0                     | 24,803          | 144,433,160         | 17.17                                                |
| 1987 | 0                     | 24,847          | 146,663,450         | 16.94                                                |
| 1988 | 0.43                  | 24,479          | 148,731,560         | 16.46                                                |
| 1989 | 0.43                  | 24,623          | 150,734,000         | 16.34                                                |
| 1990 | 0.43                  | 25,247          | 152,138,190         | 16.59                                                |

Table continues

provide trends in SSRI use using NHANES data (see Web Figure 1, available at <http://aje.oxfordjournals.org/>) and further examined the sensitivity of the results to data source.

Gun ownership is often considered to be a prime determinant of suicide risk (43); we incorporated the national gun ownership rate using data from Gallup polls (Gallup, Inc., Washington, DC) conducted from 1968 to 2009, which asked respondents whether they had a gun in their house (44). Finally, because financial crises are often marked by suicide as households face economic hardship (45), we marked years with stock market crashes, defined as broad double-digit declines in stock prices. We examined the sensitivity of results using annual county-level unemployment rates. All analyses were completed using Stata 13/IC (StataCorp LP, College Station, Texas).

## Analysis

For descriptive analyses (shown in Figure 1), we calculated yearly age-, race-, and sex-standardized suicide rates, using direct standardization on cell-specific death and midyear

**Table 1.** Continued

| Year  | Estimated SSRI Use, % | No. of Suicides | No. of Person-Years | Crude Suicide Rate per 100,000 Adults Aged ≥25 Years |
|-------|-----------------------|-----------------|---------------------|------------------------------------------------------|
| 1991  | 0.52                  | 25,228          | 155,146,300         | 16.26                                                |
| 1992  | 0.61                  | 24,912          | 157,449,810         | 15.82                                                |
| 1993  | 0.61                  | 25,280          | 159,594,750         | 15.84                                                |
| 1994  | 0.61                  | 25,150          | 161,702,410         | 15.55                                                |
| 1995  | 2.36                  | 25,466          | 163,903,230         | 15.54                                                |
| 1996  | 4.11                  | 25,479          | 166,098,880         | 15.34                                                |
| 1997  | 4.74                  | 25,243          | 168,084,950         | 15.02                                                |
| 1998  | 5.22                  | 25,316          | 169,836,690         | 14.91                                                |
| 1999  | 5.35                  | 22,393          | 171,478,250         | 13.06                                                |
| 2000  | 5.85                  | 22,482          | 172,665,810         | 13.02                                                |
| 2001  | 6.82                  | 23,586          | 174,739,300         | 13.50                                                |
| 2002  | 7.63                  | 24,375          | 176,465,660         | 13.81                                                |
| 2003  | 7.69                  | 24,280          | 178,158,410         | 13.63                                                |
| 2004  | 8.29                  | 24,783          | 180,053,440         | 13.76                                                |
| 2005  | 8.50                  | 25,051          | 182,174,610         | 13.75                                                |
| 2006  | 8.26                  | 24,185          | 183,394,590         | 13.19                                                |
| 2007  | 7.62                  | 25,206          | 185,493,080         | 13.59                                                |
| 2008  | 7.97                  | 26,408          | 187,490,230         | 14.09                                                |
| 2009  | 8.28                  | 26,936          | 189,829,170         | 14.19                                                |
| Total | 2.44                  | 977,007         | 6,234,864,360       | 15.67                                                |

Abbreviation: SSRI, selective serotonin reuptake inhibitor.

<sup>a</sup> Data were obtained from the National Center for Health Statistics Compressed Mortality File (1968–2009), the National Health and Nutrition Examination Survey (1988–1994), and the Medical Expenditure Panel Survey (1996–2009).

population counts; we used linear regression on aggregate rates to obtain descriptive trends using the following equation:  $\text{rate} = \beta_0 + \beta_1 \text{year} + \beta_2 \text{SSRI use}$ . We relied on negative binomial regression to predict suicide rates in a multivariate context. Negative binomial regression assumes that data are gamma-distributed with  $E(y) = \lambda$ , and the model is fitted using maximum-likelihood estimation:  $\ln(\lambda) = X\beta$ . A negative binomial is preferable to Poisson regression when data are overdispersed ( $\alpha > 0$ ), which occurs when the outcome's variance is larger than the mean (46). Age-, sex-, and race-specific population counts for each county were used to capture the population at risk of suicide. Both descriptive and multivariate analyses were weighted to the 2000 US population. Because of repeat measurement at the county level, we used Huber-White clustered standard errors (47). For ease of interpretation, we provide mortality rate ratios and their 95% confidence intervals. A mortality rate ratio of 1.05 suggests that 1 unit of change in SES is associated with a 5% increase in suicide risk.

We expected suicide rates to decrease following the introduction of SSRIs in January 1988 (48). We constructed a baseline model (model 1) adjusting for gun ownership, financial crises, age, sex, race, SES, and SSRI use. To examine

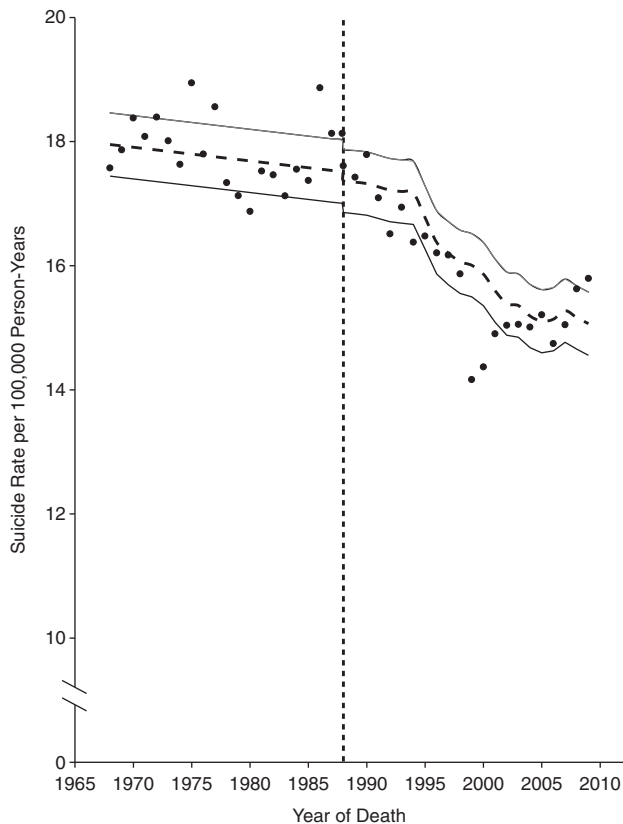

**Figure 1.** Yearly age-, sex-, and race-adjusted suicide rates (black dots) and yearly trends reflecting selective serotonin reuptake inhibitor (SSRI) usage (long-dashed line) with 95% confidence intervals (solid lines), United States, 1968–2009. The year of SSRI introduction (1988) is indicated by the vertical dashed line. Data were obtained from the National Center for Health Statistics Compressed Mortality File.

how SES changed, we then included a term for interaction between SES and SSRI use (model 2), which separated SES-related associations existing prior to the introduction of SSRIs (when SSRI use was set to 0) from those existing when SSRI use was increasing. To better clarify results from these models, we estimated population averages in graphical analyses. To compare the fit of negative binomial models, we used the Akaike Information Criterion (49).

## RESULTS

Figure 1 illustrates changes in age-, sex-, and race-adjusted suicide rates over a period of 42 years. We found that prior to 1988, deaths attributable to suicide were decreasing slightly ( $P < 0.05$ ) at a rate of  $-0.07$  per 100,000 adults aged  $\geq 25$  years. With the introduction and increasing use of SSRIs, the number of suicides declined more rapidly at a rate of  $-0.022$  per 100,000 adults aged  $\geq 25$  years for every 1% increase in SSRI use ( $P < 0.05$ ).

Figure 2 provides estimated trends in yearly SSRI use. First, SSRI use was zero in 1987, before SSRIs were made

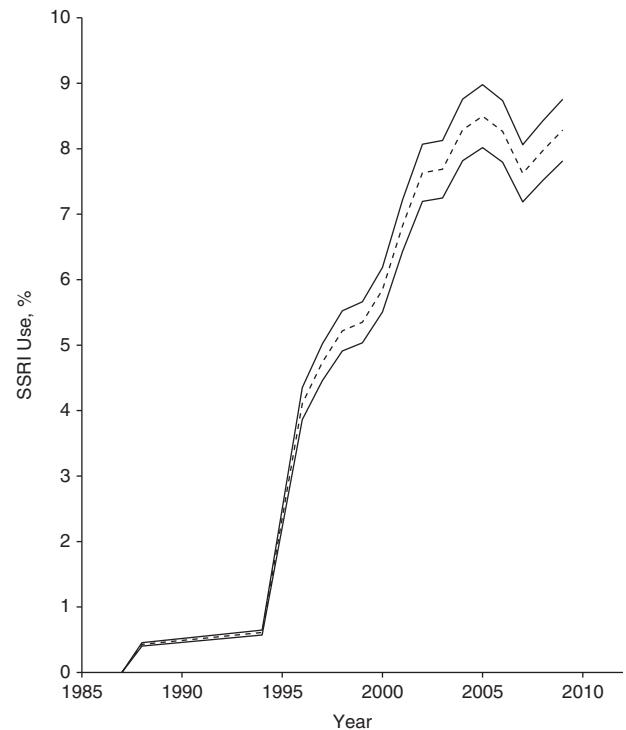

**Figure 2.** Selective serotonin reuptake inhibitor (SSRI) use among persons aged 25 years or more (dashed line) and its 95% confidence interval (solid lines), United States, 1985–2009. Data were obtained from the National Health and Nutrition Examination Survey (1991–1994) and the Medical Expenditure Panel Survey (1996–2009).

available. Once SSRIs were introduced, we observed a slow increase in SSRI use until 1994. This relatively slow climb was followed by a period of rapid increase in SSRI use in the mid- to late 1990s. This rapid rise then tapered off somewhat and peaked at 8.5% in 2005, having declined somewhat since.

To capture the association between SES and suicide and determine the extent to which this relationship depended on SSRI utilization, we used negative binomial regression models (Table 2). Model 1 shows that SSRI use was associated with a reduction in suicide: A 1% increase in SSRI use was associated with a 0.5% decrease in suicide risk. Assessed over the entire period (1968–2009), SES showed a protective association with suicide; however, this result did not test whether that association had changed with the changing availability of SSRIs. As a result, we next incorporated an interaction term that multiplied SES by SSRI use (model 2), resulting in a better-fitting model. We found that prior to the advent of SSRIs, SES was not significantly associated with suicide ( $P = 0.086$ ). However, once SSRIs became available, the protective association of SES with deaths attributable to suicide increased by 0.6% ( $1 - 0.994 \times 100$ ) for each 1% increase in SSRI use.

We used the results shown in model 2 of Table 2 to obtain population averages estimating the relative impact of SSRI use in counties with SES 1 standard deviation above the



**Table 2.** Mortality Rate Ratio for Suicide According to Use of Selective Serotonin Reuptake Inhibitors and Socioeconomic Status, United States, 1968–2009<sup>a,b</sup>

| Risk Measure              | Model 1 <sup>c</sup> |                           | Model 2 <sup>d</sup> |                           |
|---------------------------|----------------------|---------------------------|----------------------|---------------------------|
|                           | MRR                  | 95% CI                    | MRR                  | 95% CI                    |
| Per year                  | 0.994                | 0.993, 0.996 <sup>e</sup> | 0.995                | 0.993, 0.996 <sup>e</sup> |
| SSRI use, per 1% increase | 0.995                | 0.993, 0.997 <sup>e</sup> | 0.998                | 0.995, 1.000 <sup>f</sup> |
| SES, per 1-SD increase    | 0.965                | 0.940, 0.990 <sup>g</sup> | 0.979                | 0.955, 1.003              |
| SSRI use × SES            |                      |                           | 0.994                | 0.992, 0.997 <sup>e</sup> |

Abbreviations: AIC, Akaike Information Criterion; CI, confidence interval; MRR, mortality rate ratio; SD, standard deviation; SES, socioeconomic status; SSRI, selective serotonin reuptake inhibitor.

<sup>a</sup> Data were obtained from the National Center for Health Statistics Compressed Mortality File.

<sup>b</sup> Analyses were weighted to the 2000 US population. Exposure was modeled using the midyear population. All models additionally adjusted for individual race, sex, and age; gun ownership rates; and stock market crashes. *P* values were derived from *z* tests.

<sup>c</sup> Model 1:  $\ln(\lambda) \sim \text{year} + \text{SSRI} + \text{SES} + \text{covariates}$  (race, sex, age, gun ownership rates, and stock market crashes); AIC = 387,097.

<sup>d</sup> Model 2:  $\ln(\lambda) \sim \text{year} + \text{SSRI} + \text{SES} + (\text{SES} \times \text{SSRI}) + \text{covariates}$  (same as those in model 1); AIC = 387,064.

<sup>e</sup> *P* < 0.001.

<sup>f</sup> *P* = 0.032.

<sup>g</sup> *P* = 0.007.

population average and counties with SES 1 standard deviation below the population average. As Figure 3 shows, prior to 1988 there was no significant association between SES and suicide, but upon the distribution of SSRIs, there was a substantial decrease in suicide in high-SES counties and no decrease in lower-SES counties. By 2009, this resulted in a suicide risk that was 13.6% lower in counties with SES 1 standard deviation above the population average than in counties with SES 1 standard deviation below: a difference of 1.9 fewer suicides per 100,000 adults aged  $\geq 25$  years. Sensitivity analyses adjusting for yearly unemployment rates and using national-level SSRI usage rates derived solely from NHANES data did not change these conclusions; specifically, the association of the static measure of SES with suicide remained nonsignificant, while the interaction between SES and SSRI use remained significant.

## DISCUSSION

We linked age-, race-, sex-, and geographic area-specific data on SSRI use to population-level death certificate data on suicides in the United States for the period 1968–2009 to examine how social inequalities in suicide emerged in relation to the timing of the introduction and dissemination of SSRIs to treat depression and prevent suicide. First, we demonstrate a significant decline in suicide rates following the advent of SSRIs and their widespread use: SSRI use was associated with decreases in suicide rates. Second, we found that socioeconomic inequalities played an increasingly important role

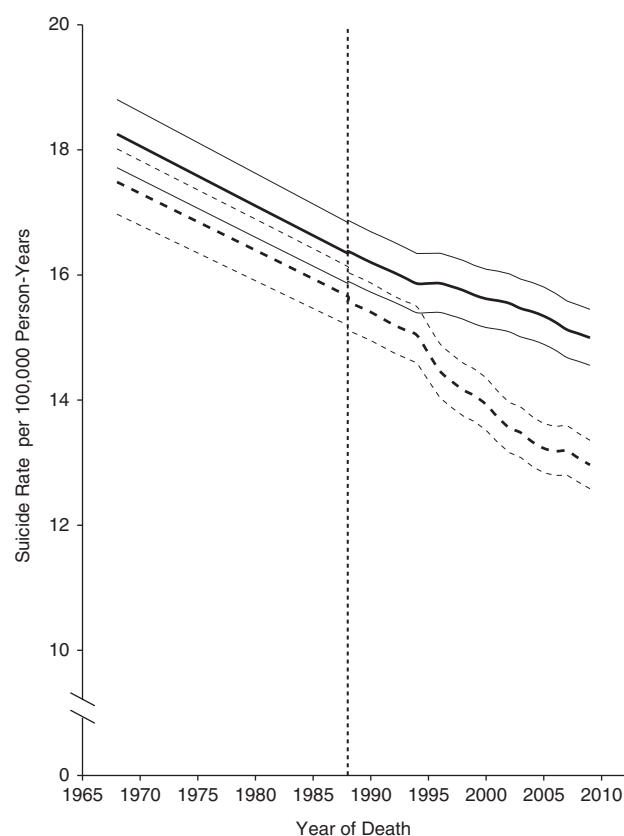

**Figure 3.** Suicide rates for persons living in counties with a socioeconomic status 1 standard deviation above the national average (thick black dashed line) and 1 standard deviation below the national average (thick black solid line), with associated 95% confidence intervals (matching thin dashed and solid lines, respectively), United States, 1968–2009. The year of selective serotonin reuptake inhibitor introduction (1988) is indicated by the vertical dashed line. Data were obtained from the National Center for Health Statistics Compressed Mortality File.

in the population patterning of deaths attributable to suicide. In 2009, residents of counties with SES 1 standard deviation above the population mean faced a 13.6% lower risk of suicide than residents of counties with SES 1 standard deviation below the mean; this was not the case in 1988, when persons of all SES levels faced similar risks of suicide.

## Limitations

Our study had some limitations. We relied on aggregate county-level data for analysis and could not examine individual-specific behaviors that might also affect risk of suicide, such as alcohol intake or use of psychotherapy, nor could we causally link SSRI use to the broad reduction in suicide rates. However, our results support prior work showing that increases in SSRI use are accompanied by decreases in suicide rates (50). Suicide, though it is one of the top 10 causes of death in the United States, remains relatively rare; thus, studying the role of treatment requires very large

samples. Though they were ecological in nature, our data were uniquely powered to study suicide, SSRI use, and SES.

These data included suicide counts generated from death certificates, which are susceptible to misclassification if religious or traditional values lead to underreporting of suicide (4). In such cases, misclassification is likely to be stable over time. To account for these results, suicides would have to have been increasingly underreported in counties with higher SES, beginning in the late 1980s—an unlikely scenario.

We could not causally identify which individuals were taking SSRIs, whether SSRI users were less likely to commit suicide, or the types of clinical problems for which people were being prescribed SSRIs. Examining causality, investigators in 1 forensic case-control study in Sweden noted that the toxicology of suicide victims was weighted towards non-SSRI antidepressants (51), though a prospective case-control study in Canada found no difference in suicide between SSRI users and those using other antidepressants (52). One way to examine causality might be to consider the impact of SSRI use in places where mental health services are available versus places where they are not, under the theory that SSRIs will be more effectively used in places where appropriate health care is available. A 2009 study which examined regional distributions in the availability of mental health care in the United States found that although service accessibility was not good overall, it was passable in 6 states and “failing outright” in 6 states (53). If we limit our analysis to these 12 states, SSRI use has no relationship with suicide in states with failing mental health systems (mortality rate ratio = 0.995,  $P = 0.128$ ) but a strong relationship in states where mental health services are passable (mortality rate ratio = 0.972,  $P < 0.001$ ). We are not aware of any other reason why SSRI treatment, SES, and suicide might be linked, nor are we aware of any reason why SES would not be linked to suicide prior to 1988.

One alternative explanation that we could not directly test is that decreases in the prevalence of depression, unrelated to treatment, have been concentrated in higher-SES counties. None of the evidence on this issue has suggested that the prevalence of depression has declined (54–56). In the MEPS data, the number of persons receiving mental health care for depression *increased* by 74% from 1999 to 2009 (57). Tracking the experience of depression over time is made difficult by changes in how people understand and report depression, partly because of interest in effective treatment. Crucially, direct-to-consumer advertising has encouraged people to label ordinary feelings of sadness as depression, thereby increasing rates of diagnosed depression in the current era. This is one reason we look to suicide as an indicator of population health; however, it also highlights the need for future research examining secular trends in depression rates.

Data on SSRI usage at the county level were not available, leading us to use regional (MEPS) or national (NHANES) rates as the next best approximation. At the same time, switching data sources could have introduced bias. It was therefore important to examine whether the 2 approaches gave consistent results. We observed a rapid rise in SSRI use between 1991 and 1994 when using NHANES data and in 1996 when we began using MEPS data, though neither data set included measures for 1995. In our data, NHANES (which has measured

SSRI usage biennially since 1999/2000, in addition to the 1988–1991 and 1991–1994 surveys) showed an explosion in SSRI usage similar to that of MEPS (Web Figure 1). This rapid rise is further supported by SSRI prescription data, which show a slow uptake between 1988 and 1993, a period when the number of prescriptions remained relatively stable (approximately 10 million), and then a rapid increase in the mid-1990s, so that nearly 21 million SSRI prescriptions were filled in the United States in 1996 (50). Use of NHANES data, rather than the MEPS data presented here, does not change conclusions.

### SSRI treatment and SES

Depression, a driving force behind suicidal behaviors, is a psychiatric disorder that remains underdiagnosed and undertreated in the United States (28). This condition is typically treated using a variety of approaches such as psychotherapy and pharmacology, including but not limited to SSRI antidepressants (58). SSRI treatment is not the only treatment available for depression; trained psychotherapists should evaluate patients and provide a full range of options. However, recent research has highlighted the effectiveness of SSRI treatment in preventing suicide (19, 20, 59, 60). Our results support this view, showing that following the widespread introduction of SSRIs for treatment of depression in 1988, suicide rates among adults aged 25 years or older decreased.

We found that SSRI use increased rapidly until peaking in 2005, with 8.5% of the US population aged  $\geq 25$  years reporting use. Such a pattern is similar to that of suicide trends, which hovered around 10.7 per 100,000 US population in the early 2000s and had risen to 12.0 per 100,000 by 2010 (22). The rise in suicide since 2006 may represent significant stress during the financial crisis of 2008–2009, which was accounted for in our models. Also likely, this increase may represent a significant change in Medicaid policy, which, though focused on increasing coverage, caused Medicaid prescription volumes and payments to rapidly drop in 2006 and recover slowly thereafter (61).

Broad SSRI treatment is unlikely to be a good way to prevent suicide. Many people experience side effects when using SSRIs: 59% of users report such side effects, including drowsiness, weight gain, insomnia, and tremors (62). SSRI use during pregnancy has been linked to increased risk of neonatal morbidity (63). SSRI use has been linked to an increase in suicidality in younger populations (36), though this link is in dispute (64, 65). Finally, some users experience symptoms of withdrawal when stopping SSRI treatments (66). We estimate that 8% of the US population aged  $\geq 25$  years, approximately 9 million people, are currently taking SSRI antidepressants. Future attempts to reduce suicide rates should focus on targeting persons at greatest risk of suicide and those who respond best to SSRI treatment.

Prior research has posited that when effective prevention methods are found, people and groups with more resources will secure access to those services in a timelier and more effective manner than those with fewer resources (11, 13, 67). Many people who commit suicide have sought professional help in the months leading up to their death, yet few who are seen by health-care professionals, including physicians, are

prescribed SSRIs or referred to mental health professionals for treatment (29, 30). When seeking help for depression, persons with greater financial resources tend to access mental health professionals more often than other sources of medical and non-medical care (28). We found support for the theory that SES-based disparities in suicide arose with the widespread dispersal of SSRIs, which were concentrated in areas of higher SES.

Public health interventions, better medical treatments, and improving social conditions have lengthened life and improved health in the United States, yet social inequalities in all-cause (68) and cause-specific (13, 14, 17, 67) mortality are rapidly increasing. Social inequalities are both inequitable and inefficient: They delay the elimination of disease and cause such diseases to disproportionately impact the most vulnerable. To avoid this, we need engaged research programs that focus on understanding the emergence of social inequalities in disease, and we further need to actively attack social inequalities when life-saving technologies are introduced and distributed. Indeed, we need to recognize that social inequalities can arise or worsen not *despite* human intervention but rather *because* of it (11).

## ACKNOWLEDGMENTS

Author affiliations: Department of Preventive Medicine and Program in Public Health, Stony Brook University, Stony Brook, New York (Sean A. P. Clouston); Section of Social and Behavioral Sciences, College of Dental Medicine, Columbia University, New York, New York (Marcie S. Rubin); Department of Sociology, College of Arts and Sciences, Ohio State University, Columbus, Ohio (Cynthia G. Colen); Departments of Sociomedical Sciences and Epidemiology, Mailman School of Public Health, Columbia University, New York, New York (Bruce G. Link); and New York State Psychiatric Institute, New York, New York (Bruce G. Link).

We thank the Robert Wood Johnson Foundation for financial support. This project was originally developed with the support of the Canada-U.S. Fulbright Program.

An early version of this paper was presented at the 78th Annual Meeting of the Population Association of America, New Orleans, Louisiana, April 11–13, 2013.

The analyses and findings presented here are the sole responsibility of the authors and not the National Center for Health Statistics.

Conflict of interest: none declared.

## REFERENCES

1. National Center for Health Statistics, Centers for Disease Control and Prevention. *LCWK9. Deaths, Percent of Total Deaths, and Death Rates for the 15 Leading Causes of Death: United States and Each State, 2009*. (National Vital Statistics System mortality tables). Hyattsville, MD: National Center for Health Statistics; 2012.
2. American Association of Suicidology. *Risk Factors for Suicide and Suicidal Behaviors*. Washington, DC: American Association of Suicidology; 2013.
3. Burr JA, Hartman JT, Matteson DW. Black suicide in U.S. metropolitan areas: an examination of the racial inequality and social integration-regulation hypotheses. *Soc Forces*. 1999; 77(3):1049–1080.
4. Wray M, Colen C, Pescosolido B. The sociology of suicide. *Annu Rev Sociol*. 2011;37:505–528.
5. Kreitman N, Carstairs V, Duffy J. Association of age and social class with suicide among men in Great Britain. *J Epidemiol Community Health*. 1991;45(3):195–202.
6. Milner A, Page A, Lamontagne AD. Cause and effect in studies on unemployment, mental health and suicide: a meta-analytic and conceptual review. *Psychol Med*. 2014;44(5):909–917.
7. Lee WY, Khang YH, Noh M, et al. Trends in educational differentials in suicide mortality between 1993–2006 in Korea. *Yonsei Med J*. 2009;50(4):482–492.
8. Kim MD, Hong SC, Lee SY, et al. Suicide risk in relation to social class: a national register-based study of adult suicides in Korea, 1999–2001. *Int J Soc Psychiatry*. 2006;52(2): 138–151.
9. Woo H, Saint Onge JM, Standridge D. Suicide mortality risk in the United States by sex and age groups [abstract]. Presented at the 78th annual meeting of the Population Association of America, New Orleans, Louisiana, April 11–13, 2013. <http://paa2013.princeton.edu/abstracts/132568>. Accessed April 11, 2013.
10. Phelan JC, Link BG. Controlling disease and creating disparities: a fundamental cause perspective. *J Gerontol B Psychol Sci Soc Sci*. 2005;60(special issue 2):S27–S33.
11. Phelan JC, Link BG, Diez-Roux A, et al. “Fundamental causes” of social inequalities in mortality: a test of the theory. *J Health Soc Behav*. 2004;45(3):265–285.
12. Phelan JC, Link BG, Tehranifar P. Social conditions as fundamental causes of health inequalities: theory, evidence, and policy implications. *J Health Soc Behav*. 2010;51(1 suppl): S28–S40.
13. Saldana-Ruiz N, Clouston SA, Rubin MS, et al. Fundamental causes of colorectal cancer mortality in the United States: understanding the importance of socioeconomic status in creating inequality in mortality. *Am J Public Health*. 2013; 103(1):99–104.
14. Rubin MS, Clouston S, Link BG. A fundamental cause approach to the study of disparities in lung cancer and pancreatic cancer mortality in the United States. *Soc Sci Med*. 2014;100:54–61.
15. Polonijo AN, Carpiano RM. Social inequalities in adolescent human papillomavirus (HPV) vaccination: a test of fundamental cause theory. *Soc Sci Med*. 2013;82:115–125.
16. Miller DC, Saigal CS, Banerjee M, et al. Diffusion of surgical innovation among patients with kidney cancer. *Cancer*. 2008; 112(8):1708–1717.
17. Wang A, Clouston SA, Rubin MS, et al. Fundamental causes of colorectal cancer mortality: the implications of informational diffusion. *Milbank Q*. 2012;90(3):592–618.
18. Isacsson G, Bergman U, Rich CL. Epidemiological data suggest antidepressants reduce suicide risk among depressives. *J Affect Disord*. 1996;41(1):1–8.
19. Stone M, Laughren T, Jones ML, et al. Risk of suicidality in clinical trials of antidepressants in adults: analysis of proprietary data submitted to US Food and Drug Administration. *BMJ*. 2009;339:b2880.
20. Barbui C, Esposito E, Cipriani A. Selective serotonin reuptake inhibitors and risk of suicide: a systematic review of observational studies. *CMAJ*. 2009;180(3):291–297.
21. Olfson M, Marcus SC. National patterns in antidepressant medication treatment. *Arch Gen Psychiatry*. 2009;66(8): 848–856.



22. National Center for Health Statistics, Centers for Disease Control and Prevention. *Health Data Interactive* [database]. Hyattsville, MD: National Center for Health Statistics; 2013. <http://www.cdc.gov/nchs/hdi.htm>. Accessed June 5, 2013.
23. Ludwig J, Marcotte DE. Anti-depressants, suicide, and drug regulation. *J Policy Anal Manage*. 2005;24(2): 249–272.
24. Gibbons RD, Hur K, Bhaumik DK, et al. The relationship between antidepressant medication use and rate of suicide. *Arch Gen Psychiatry*. 2005;62(2):165–172.
25. Erlangsen A, Canudas-Romo V, Conwell Y. Increased use of antidepressants and decreasing suicide rates: a population-based study using Danish register data. *J Epidemiol Community Health*. 2008;62(5):448–454.
26. Ludwig J, Marcotte DE, Norberg K. Anti-depressants and suicide. *J Health Econ*. 2009;28(3):659–676.
27. Bijl RV, Ravelli A. Psychiatric morbidity, service use, and need for care in the general population: results of The Netherlands Mental Health Survey and Incidence Study. *Am J Public Health*. 2000;90(4):602–607.
28. Wang PS, Demler O, Olfson M, et al. Changing profiles of service sectors used for mental health care in the United States. *Am J Psychiatry*. 2006;163(7):1187–1198.
29. Isacson G, Boëthius G, Bergman U. Low level of antidepressant prescription for people who later commit suicide: 15 years of experience from a population-based drug database in Sweden. *Acta Psychiatr Scand*. 1992;85(6): 444–448.
30. Smith EG, Craig TJ, Ganoczy D, et al. Treatment of veterans with depression who died by suicide: timing and quality of care at last Veterans Health Administration visit. *J Clin Psychiatry*. 2011;72(5):622–629.
31. Hansen DG, Søndergaard J, Vach W, et al. Socio-economic inequalities in first-time use of antidepressants: a population-based study. *Eur J Clin Pharmacol*. 2004;60(1):51–55.
32. Kivimäki M, Gunnell D, Lawlor DA, et al. Social inequalities in antidepressant treatment and mortality: a longitudinal register study. *Psychol Med*. 2007;37(3):373–382.
33. National Center for Health Statistics, Centers for Disease Control and Prevention. *Compressed Mortality File, 1968–1988*. (Machine readable data file and documentation, CD-ROM series 20, no. 2A). Hyattsville, MD: National Center for Health Statistics; 2012.
34. National Center for Health Statistics, Centers for Disease Control and Prevention. *Compressed Mortality File, 1989–1998*. (Machine readable data file and documentation, CD-ROM series 20, no. 2E). Hyattsville, MD: National Center for Health Statistics; 2012.
35. National Center for Health Statistics, Centers for Disease Control and Prevention. *Compressed Mortality File, 1999–2009*. (Machine readable data file and documentation, CD-ROM series 20, no. 2O). Hyattsville, MD: National Center for Health Statistics; 2012.
36. Olfson M, Shaffer D, Marcus SC, et al. Relationship between antidepressant medication treatment and suicide in adolescents. *Arch Gen Psychiatry*. 2003;60(10):978–982.
37. Garland EJ. Facing the evidence: antidepressant treatment in children and adolescents. *CMAJ*. 2004;170(4):489–491.
38. Whittington CJ, Kendall T, Fonagy P, et al. Selective serotonin reuptake inhibitors in childhood depression: systematic review of published versus unpublished data. *Lancet*. 2004;363(9418): 1341–1345.
39. Friedman RA, Leon AC. Expanding the black box—depression, antidepressants, and the risk of suicide. *N Engl J Med*. 2007;356(23):2343–2346.
40. Singh GK, Miller BA, Hankey BF. Changing area socioeconomic patterns in U.S. cancer mortality, 1950–1998: part II—lung and colorectal cancers. *J Natl Cancer Inst*. 2002; 94(12):916–925.
41. Agency for Healthcare Research and Quality, US Department of Health and Human Services. *Medical Expenditure Panel Survey (MEPS)* [data set]. Rockville, MD: Agency for Healthcare Research and Quality; 2012. <http://www.ahrq.gov/research/data/meps/index.html>. Accessed March 19, 2013.
42. National Center for Health Statistics, Centers for Disease Control and Prevention. *National Health and Nutrition Examination Survey Data (NHANES)* [data set]. Hyattsville, MD: National Center for Health Statistics; 2013. <http://www.cdc.gov/nchs/nhanes.htm>. Accessed December 12, 2012.
43. Ajdacic-Gross V, Killias M, Hepp U, et al. Firearm suicides and availability of firearms: the Swiss experience. *Eur Psychiatry*. 2010;25(7):432–434.
44. Gallup, Inc. *Gallup Historical Trends. Guns*. Washington, DC: Gallup, Inc.; 2013. <http://www.gallup.com/poll/1645/guns.aspx>. Accessed July 2, 2013.
45. Chang S-S, Stuckler D, Yip P, et al. Impact of 2008 global economic crisis on suicide: time trend study in 54 countries. *BMJ*. 2013;347:f5239.
46. Gardner W, Mulvey EP, Shaw EC. Regression analyses of counts and rates: Poisson, overdispersed Poisson, and negative binomial models. *Psychol Bull*. 1995;118(3):392–404.
47. Williams RL. A note on robust variance estimation for cluster-correlated data. *Biometrics*. 2000;56(2):645–646.
48. Stokes P. Fluoxetine: a five-year review. *Clin Ther*. 1992;15(2): 216–243.
49. Wagenmakers EJ, Farrell S. AIC model selection using Akaike weights. *Psychon Bull Rev*. 2004;11(1):192–196.
50. Milane MS, Suchard MA, Wong M-L, et al. Modeling of the temporal patterns of fluoxetine prescriptions and suicide rates in the United States. *PLOS Med*. 2006;3(6):e190.
51. Isacson G, Holmgren A, Osby U, et al. Decrease in suicide among the individuals treated with antidepressants: a controlled study of antidepressants in suicide, Sweden 1995–2005. *Acta Psychiatr Scand*. 2009;120(1):37–44.
52. Schneeweiss S, Patrick AR, Solomon DH, et al. Variation in the risk of suicide attempts and completed suicides by antidepressant agent in adults: a propensity score-adjusted analysis of 9 years' data. *Arch Gen Psychiatry*. 2010;67(5): 497–506.
53. Aron L, Honberg R, Duckworth K, et al. The state of public mental health services across the nation. In: *Grading the States 2009: A Report on America's Health Care System for Adults with Serious Mental Illness*. Arlington, VA: National Alliance on Mental Illness; 2009:23–46. [http://www.nami.org/gtsTemplate09.cfm?Section=Grading\\_the\\_States\\_2009&Template=/ContentManagement/ContentDisplay.cfm&ContentID=75459](http://www.nami.org/gtsTemplate09.cfm?Section=Grading_the_States_2009&Template=/ContentManagement/ContentDisplay.cfm&ContentID=75459). Accessed October 28, 2013.
54. Sigfusdottir ID, Asgeirsdottir BB, Sigurdsson JF, et al. Trends in depressive symptoms, anxiety symptoms and visits to healthcare specialists: a national study among Icelandic adolescents. *Scand J Public Health*. 2008;36(4):361–368.
55. Zivin K, Pirraglia PA, McCammon RJ, et al. Trends in depressive symptom burden among older adults in the United States from 1998 to 2008. *J Gen Intern Med*. 2013;28(12): 1611–1619.
56. Rait G, Walters K, Griffin M, et al. Recent trends in the incidence of recorded depression in primary care. *Br J Psychiatry*. 2009;195(6):520–524.
57. Soni A. *Trends in Use and Expenditures for Depression Among U.S. Adults Age 18 and Older, Civilian Noninstitutionalized*



- Population, 1999 and 2009.* (Statistical brief 377). Rockville, MD: Agency for Healthcare Research and Quality; 2012. [http://meps.ahrq.gov/mepsweb/data\\_files/publications/st377/stat377.shtml](http://meps.ahrq.gov/mepsweb/data_files/publications/st377/stat377.shtml). Accessed February 25, 2014.
58. McIntyre J, Yager J, Anzia DJ, et al. *Practice Guideline for the Treatment of Patients with Major Depressive Disorder*. 3rd ed. Arlington, VA: American Psychiatric Association; 2010.
  59. McKeown RE, Cuffe SP, Schulz RM. US suicide rates by age group, 1970–2002: an examination of recent trends. *Am J Public Health*. 2006;96(10):1744–1751.
  60. Leon AC, Solomon DA, Li C, et al. Antidepressants and risks of suicide and suicide attempts: a 27-year observational study. *J Clin Psychiatry*. 2011;72(5):580–586.
  61. Bruen BK, Miller LM. Changes in Medicaid prescription volume and use in the wake of Medicare Part D implementation. *Health Aff (Millwood)*. 2008;27(1):196–202.
  62. Cascade E, Kalali AH, Kennedy SH. Real-world data on SSRI antidepressant side effects. *Psychiatry (Edmont)*. 2009;6(2):16–18.
  63. Källén B, Reis M. Neonatal complications after maternal concomitant use of SSRI and other central nervous system active drugs during the second or third trimester of pregnancy. *J Clin Psychopharmacol*. 2012;32(5):608–614.
  64. Isacson G, Ahlner J. Antidepressants and the risk of suicide in young persons—prescription trends and toxicological analyses. *Acta Psychiatr Scand*. 2014;129(4):296–302.
  65. Dudley M, Goldney R, Hadzi-Pavlovic D. Are adolescents dying by suicide taking SSRI antidepressants? A review of observational studies. *Australas Psychiatry*. 2010;18(3):242–245.
  66. Price JS, Waller PC, Wood SM, et al. A comparison of the post-marketing safety of four selective serotonin re-uptake inhibitors including the investigation of symptoms occurring on withdrawal. *Br J Clin Pharmacol*. 1996;42(6):757–763.
  67. Rubin MS, Colen CG, Link BG. Examination of inequalities in HIV/AIDS mortality in the United States from a fundamental cause perspective. *Am J Public Health*. 2010;100(6):1053–1059.
  68. Meara ER, Richards S, Cutler DM. The gap gets bigger: changes in mortality and life expectancy, by education, 1981–2000. *Health Aff (Millwood)*. 2008;27(2):350–360.
